# Supplementary material
Source: publisher figshare collection journal article supplement (https://frontiersin.figshare.com/ndownloader/files/31515977)
Supplement: Supplementary file [file 31515977]

## **The immune landscape of human primary lung tumors is Th2 skewed**

Astri Frafjord *et al.*

### **Table of Contents**

|                                                                                                                                                                                                                                                                                |    |
|--------------------------------------------------------------------------------------------------------------------------------------------------------------------------------------------------------------------------------------------------------------------------------|----|
| <u>Supplementary Table 1.</u> Correlation analysis of Th and CD8 <sup>+</sup> T cell densities (cells/mm <sup>2</sup> ) in tumor stroma and tumor epithelium from 11 NSCLC patients.....                                                                                       | 2  |
| <u>Supplementary Table 2.</u> Correlation analysis of Th subsets (as percent of the total number of CD3 <sup>+</sup> CD8 <sup>-</sup> T cells) and CD8 <sup>+</sup> T cell densities (cells/mm <sup>2</sup> ) in tumor stroma and tumor epithelium from 11 NSCLC patients..... | 3  |
| <u>Supplementary Table 3.</u> Correlation analysis of densities (cells/mm <sup>2</sup> ) of Th cell subsets and CD8 <sup>+</sup> T cells (cells/mm <sup>2</sup> ) in tertiary lymphoid structures (TLS) from 8 NSCLC patients.....                                             | 4  |
| <u>Supplementary Table 4.</u> Correlation analysis of Th subsets (as percent of the total number of CD3 <sup>+</sup> CD8 <sup>-</sup> T cells) and CD8 <sup>+</sup> T cell densities (cells/mm <sup>2</sup> ) in tertiary lymphoid structures (TLS) from 8 NSCLC patients..... | 5  |
| <u>Supplementary Table 5.</u> Correlation analysis of densities (cells/mm <sup>2</sup> ) of Th cell subsets and CD8 <sup>+</sup> T cells in distal lung from 9 NSCLC patients.....                                                                                             | 6  |
| <u>Supplementary Table 6.</u> Correlation analysis of Th cell subsets (as percent of the total number of CD3 <sup>+</sup> CD8 <sup>-</sup> T cells) and CD8 <sup>+</sup> T cell densities (cells/mm <sup>2</sup> ) in distal lung from 9 NSCLC patients.....                   | 7  |
| <u>Supplementary Table 7.</u> Protocols for multiplex chromogenic IHC for detection of Th cell subsets in human tumors.....                                                                                                                                                    | 8  |
| <u>Supplementary Table 8.</u> List of primary monoclonal antibodies (mAbs) used to detect T cell subsets and lung carcinoma cells by IHC.....                                                                                                                                  | 9  |
| <u>Supplementary Table 9.</u> List of secondary antibodies used for IHC.....                                                                                                                                                                                                   | 9  |
| <u>Supplementary Table 10.</u> List of reagents used for multiplex chromogenic IHC .....                                                                                                                                                                                       | 10 |
| <u>Supplementary Table 11.</u> List of primary antibodies used for immunofluorescence.....                                                                                                                                                                                     | 11 |
| <u>Supplementary Table 12.</u> List of secondary antibodies used for immunofluorescence.....                                                                                                                                                                                   | 11 |
| <u>Supplementary Table 13.</u> List of reagents used for immunofluorescence.....                                                                                                                                                                                               | 11 |
| <u>Supplementary Figure 1.</u> Validation of multiplex IHC of Th1, Th2 and Th17 cell subsets using positive tissue controls.....                                                                                                                                               | 12 |
| <u>Supplementary Figure 2.</u> Validation of multiplex IHC of Tfh and Treg cell subsets using positive tissue controls.....                                                                                                                                                    | 13 |
| <u>Supplementary Figure 3.</u> Isotype-matched antibodies with irrelevant specificity as controls for multiplex IHC of Th1 and Th2 subsets .....                                                                                                                               | 14 |
| <u>Supplementary Figure 4.</u> Isotype-matched antibodies with irrelevant specificity as controls for multiplex IHC of Treg, Th17 and Tfh subsets .....                                                                                                                        | 15 |
| <u>Supplementary Figure 5.</u> Validation of the anti-T-bet mAb using another clone .....                                                                                                                                                                                      | 16 |
| <u>Supplementary Figure 6.</u> Validation of the anti-BCL6 mAb using another clone.....                                                                                                                                                                                        | 17 |
| <u>Supplementary Figure 7.</u> Detection of Th1 and Th2 cells by immunofluorescence staining of chemokine receptors in NSCLC tumors .....                                                                                                                                      | 18 |
| <u>Supplementary Figure 8.</u> Detection of Th1 and Th2 cells by immunofluorescence staining of chemokine receptors in tertiary lymphoid structures (TLS).....                                                                                                                 | 19 |
| <u>Supplementary Figure 9.</u> Comparison of the number of intratumoral Th1 and Th2 cells detected by chromogenic IHC vs. immunofluorescence.....                                                                                                                              | 20 |
| <u>Supplementary Figure 10.</u> Comparison of the number of Th1 and Th2 cells detected by chromogenic IHC vs. immunofluorescence in tertiary lymphoid structures (TLS).....                                                                                                    | 21 |
| <u>Supplementary Figure 11.</u> Isotype-matched antibodies with irrelevant specificity as controls for immunofluorescence staining.....                                                                                                                                        | 22 |

**Supplementary Table 1. Correlation analysis of Th and CD8<sup>+</sup> T cell densities (cells/mm<sup>2</sup>) in tumor stroma and tumor epithelium from 11 NSCLC patients<sup>#</sup>**

| Correlations   |                                                | Spearman's rho                            |                                               |                                           |                                               |                                            |                                                |                                            |                                                |                                           |                                               |                                           |                                               |       |
|----------------|------------------------------------------------|-------------------------------------------|-----------------------------------------------|-------------------------------------------|-----------------------------------------------|--------------------------------------------|------------------------------------------------|--------------------------------------------|------------------------------------------------|-------------------------------------------|-----------------------------------------------|-------------------------------------------|-----------------------------------------------|-------|
|                |                                                | Th1<br>stroma<br>(cells/mm <sup>2</sup> ) | Th1<br>epithelium<br>(cells/mm <sup>2</sup> ) | Th2<br>stroma<br>(cells/mm <sup>2</sup> ) | Th2<br>epithelium<br>(cells/mm <sup>2</sup> ) | Th17<br>stroma<br>(cells/mm <sup>2</sup> ) | Th17<br>epithelium<br>(cells/mm <sup>2</sup> ) | Treg<br>stroma<br>(cells/mm <sup>2</sup> ) | Treg<br>epithelium<br>(cells/mm <sup>2</sup> ) | Tfh<br>stroma<br>(cells/mm <sup>2</sup> ) | Tfh<br>epithelium<br>(cells/mm <sup>2</sup> ) | CD8<br>stroma<br>(cells/mm <sup>2</sup> ) | CD8<br>epithelium<br>(cells/mm <sup>2</sup> ) |       |
| Spearman's rho | Th1<br>stroma<br>(cells/mm <sup>2</sup> )      | Correlation                               | 1.000                                         | .610                                      | .600                                          | .473                                       | .165                                           | .000                                       | .373                                           | .210                                      | .624                                          | .405                                      | .718                                          | .691  |
|                |                                                | P value                                   | .                                             | .046                                      | .051                                          | .142                                       | .627                                           | 1.000                                      | .259                                           | .536                                      | .040                                          | .217                                      | .013                                          | .019  |
|                |                                                | N                                         | 11                                            | 11                                        | 11                                            | 11                                         | 11                                             | 11                                         | 11                                             | 11                                        | 11                                            | 11                                        | 11                                            | 11    |
|                | Th1<br>epithelium<br>(cells/mm <sup>2</sup> )  | Correlation                               |                                               | 1.000                                     | .753                                          | .839                                       | .308                                           | .000                                       | .200                                           | .459                                      | .760                                          | .479                                      | .191                                          | .648  |
|                |                                                | P value                                   |                                               | .                                         | .007                                          | .001                                       | .357                                           | 1.000                                      | .555                                           | .156                                      | .007                                          | .136                                      | .574                                          | .031  |
|                |                                                | N                                         |                                               | 11                                        | 11                                            | 11                                         | 11                                             | 11                                         | 11                                             | 11                                        | 11                                            | 11                                        | 11                                            | 11    |
|                | Th2<br>stroma<br>(cells/mm <sup>2</sup> )      | Correlation                               |                                               |                                           | 1.000                                         | .818                                       | .312                                           | .300                                       | .473                                           | .579                                      | .780                                          | .370                                      | .173                                          | .527  |
|                |                                                | P value                                   |                                               |                                           | .                                             | .002                                       | .350                                           | .370                                       | .142                                           | .062                                      | .005                                          | .263                                      | .612                                          | .096  |
|                |                                                | N                                         |                                               |                                           | 11                                            | 11                                         | 11                                             | 11                                         | 11                                             | 11                                        | 11                                            | 11                                        | 11                                            | 11    |
|                | Th2<br>epithelium<br>(cells/mm <sup>2</sup> )  | Correlation                               |                                               |                                           |                                               | 1.000                                      | .055                                           | -.200                                      | .118                                           | .784                                      | .670                                          | .202                                      | .200                                          | .736  |
|                |                                                | P value                                   |                                               |                                           |                                               | .                                          | .872                                           | .555                                       | .729                                           | .004                                      | .024                                          | .551                                      | .555                                          | .010  |
|                |                                                | N                                         |                                               |                                           |                                               | 11                                         | 11                                             | 11                                         | 11                                             | 11                                        | 11                                            | 11                                        | 11                                            | 11    |
|                | Th17<br>stroma<br>(cells/mm <sup>2</sup> )     | Correlation                               |                                               |                                           |                                               |                                            | 1.000                                          | .505                                       | .688                                           | -.009                                     | .519                                          | .758                                      | -.064                                         | .055  |
|                |                                                | P value                                   |                                               |                                           |                                               |                                            | .                                              | .113                                       | .019                                           | .979                                      | .102                                          | .007                                      | .851                                          | .872  |
|                |                                                | N                                         |                                               |                                           |                                               |                                            | 11                                             | 11                                         | 11                                             | 11                                        | 11                                            | 11                                        | 11                                            | 11    |
|                | Th17<br>epithelium<br>(cells/mm <sup>2</sup> ) | Correlation                               |                                               |                                           |                                               |                                            |                                                | 1.000                                      | .400                                           | -.301                                     | .303                                          | .509                                      | -.300                                         | -.400 |
|                |                                                | P value                                   |                                               |                                           |                                               |                                            |                                                | .                                          | .223                                           | .369                                      | .365                                          | .110                                      | .370                                          | .223  |
|                |                                                | N                                         |                                               |                                           |                                               |                                            |                                                | 11                                         | 11                                             | 11                                        | 11                                            | 11                                        | 11                                            | 11    |
|                | Treg<br>stroma<br>(cells/mm <sup>2</sup> )     | Correlation                               |                                               |                                           |                                               |                                            |                                                |                                            | 1.000                                          | .050                                      | .404                                          | .457                                      | .236                                          | .045  |
|                |                                                | P value                                   |                                               |                                           |                                               |                                            |                                                |                                            | .                                              | .884                                      | .218                                          | .158                                      | .484                                          | .894  |
|                |                                                | N                                         |                                               |                                           |                                               |                                            |                                                |                                            | 11                                             | 11                                        | 11                                            | 11                                        | 11                                            | 11    |
|                | Treg<br>epithelium<br>(cells/mm <sup>2</sup> ) | Correlation                               |                                               |                                           |                                               |                                            |                                                |                                            |                                                | 1.000                                     | .474                                          | -.093                                     | .137                                          | .761  |
|                |                                                | P value                                   |                                               |                                           |                                               |                                            |                                                |                                            |                                                | .                                         | .141                                          | .786                                      | .689                                          | .007  |
|                |                                                | N                                         |                                               |                                           |                                               |                                            |                                                |                                            |                                                | 11                                        | 11                                            | 11                                        | 11                                            | 11    |
|                | Tfh<br>stroma<br>(cells/mm <sup>2</sup> )      | Correlation                               |                                               |                                           |                                               |                                            |                                                |                                            |                                                |                                           | 1.000                                         | .548                                      | .083                                          | .624  |
|                |                                                | P value                                   |                                               |                                           |                                               |                                            |                                                |                                            |                                                |                                           | .                                             | .081                                      | .809                                          | .040  |
|                |                                                | N                                         |                                               |                                           |                                               |                                            |                                                |                                            |                                                |                                           | 11                                            | 11                                        | 11                                            | 11    |
|                | Tfh<br>epithelium<br>(cells/mm <sup>2</sup> )  | Correlation                               |                                               |                                           |                                               |                                            |                                                |                                            |                                                |                                           |                                               | 1.000                                     | .237                                          | .173  |
|                |                                                | P value                                   |                                               |                                           |                                               |                                            |                                                |                                            |                                                |                                           |                                               | .                                         | .483                                          | .610  |
|                |                                                | N                                         |                                               |                                           |                                               |                                            |                                                |                                            |                                                |                                           |                                               | 11                                        | 11                                            | 11    |
|                | CD8<br>stroma<br>(cells/mm <sup>2</sup> )      | Correlation                               |                                               |                                           |                                               |                                            |                                                |                                            |                                                |                                           |                                               |                                           | 1.000                                         | .536  |
|                |                                                | P value                                   |                                               |                                           |                                               |                                            |                                                |                                            |                                                |                                           |                                               |                                           | .                                             | .089  |
|                |                                                | N                                         |                                               |                                           |                                               |                                            |                                                |                                            |                                                |                                           |                                               |                                           | 11                                            | 12    |
|                | CD8<br>epithelium<br>(cells/mm <sup>2</sup> )  | Correlation                               |                                               |                                           |                                               |                                            |                                                |                                            |                                                |                                           |                                               |                                           |                                               | 1.000 |
|                |                                                | P value                                   |                                               |                                           |                                               |                                            |                                                |                                            |                                                |                                           |                                               |                                           |                                               | .     |
|                |                                                | N                                         |                                               |                                           |                                               |                                            |                                                |                                            |                                                |                                           |                                               |                                           |                                               | 11    |

<sup>#</sup> Spearman's Rank Correlation Coefficient in IBM SPSS version 26 was used to assess correlations between cell densities of individual Th subsets and CD8<sup>+</sup> T cells in tumor epithelium and tumor stroma. Value of 1 or -1 represents a perfect correlation, whereas 0 indicates no association.

\* p<0.05 level (2-tailed) highlighted in cyan, \*\* p<0.01 level (2-tailed) highlighted in yellow

**Supplementary Table 2. Correlation analysis of Th subsets (as percent of the total number of CD3<sup>+</sup>CD8<sup>-</sup> T cells) and CD8<sup>+</sup> T cell densities (cells/mm<sup>2</sup>) in tumor stroma and tumor epithelium from 11 NSCLC patients<sup>#</sup>**

**Correlations**

|                |                                               |             | Th1<br>stroma<br>(%) | Th2<br>stroma<br>(%) | Th17<br>stroma<br>(%) | Treg<br>stroma<br>(%) | Tfh<br>stroma<br>(%) | CD8<br>epithelium<br>(cells/mm <sup>2</sup> ) | CD8<br>stroma<br>(cells/mm <sup>2</sup> ) |
|----------------|-----------------------------------------------|-------------|----------------------|----------------------|-----------------------|-----------------------|----------------------|-----------------------------------------------|-------------------------------------------|
| Spearman's rho | Th1<br>stroma<br>(%)                          | Correlation | 1.000                | -.536                | -.248                 | -.436                 | .183                 | .627*                                         | .845**                                    |
|                |                                               | P value     | .                    | .089                 | .463                  | .180                  | .589                 | .039                                          | .001                                      |
|                |                                               | N           | 11                   | 11                   | 11                    | 11                    | 11                   | 11                                            | 11                                        |
|                | Th2<br>stroma<br>(%)                          | Correlation |                      | 1.000                | -.128                 | .827**                | -.110                | -.091                                         | -.627*                                    |
|                |                                               | P value     |                      | .                    | .707                  | .002                  | .747                 | .790                                          | .039                                      |
|                |                                               | N           |                      | 11                   | 11                    | 11                    | 11                   | 11                                            | 11                                        |
|                | Th17<br>stroma<br>(%)                         | Correlation |                      |                      | 1.000                 | -.321                 | .509                 | -.046                                         | -.239                                     |
|                |                                               | P value     |                      |                      | .                     | .336                  | .110                 | .893                                          | .480                                      |
|                |                                               | N           |                      |                      | 11                    | 11                    | 11                   | 11                                            | 11                                        |
|                | Treg<br>stroma<br>(%)                         | Correlation |                      |                      |                       | 1.000                 | -.440                | -.100                                         | -.418                                     |
|                |                                               | P value     |                      |                      |                       | .                     | .175                 | .770                                          | .201                                      |
|                |                                               | N           |                      |                      |                       | 11                    | 11                   | 11                                            | 11                                        |
|                | Tfh<br>stroma<br>(%)                          | Correlation |                      |                      |                       |                       | 1.000                | .477                                          | -.092                                     |
|                |                                               | P value     |                      |                      |                       |                       | .                    | .138                                          | .788                                      |
|                |                                               | N           |                      |                      |                       |                       | 11                   | 11                                            | 11                                        |
|                | CD8<br>epithelium<br>(cells/mm <sup>2</sup> ) | Correlation |                      |                      |                       |                       |                      | 1.000                                         | .536                                      |
|                |                                               | P value     |                      |                      |                       |                       |                      | .                                             | .089                                      |
|                |                                               | N           |                      |                      |                       |                       |                      | 11                                            | 11                                        |
|                | CD8<br>stroma<br>(cells/mm <sup>2</sup> )     | Correlation |                      |                      |                       |                       |                      |                                               | 1.000                                     |
|                |                                               | P value     |                      |                      |                       |                       |                      |                                               | .                                         |
|                |                                               | N           |                      |                      |                       |                       |                      |                                               | 11                                        |

<sup>#</sup> Spearman's Rank Correlation Coefficient in IBM SPSS version 26 was used to assess the correlations between the indicated T cell populations. Value of 1 or -1 represents a perfect correlation, whereas 0 indicates no association.

\* p<0.05 level (2-tailed) highlighted in cyan

\*\* p<0.01 level (2-tailed) highlighted in yellow

**Supplementary Table 3. Correlation analysis of densities (cells/mm<sup>2</sup>) of Th cell subsets and CD8<sup>+</sup> T cells in tertiary lymphoid structures (TLS) from 8 NSCLC patients<sup>#</sup>**

| Correlations   |                                         |             | Th1<br>TLS<br>(cells/mm <sup>2</sup> ) | Th2<br>TLS<br>(cells/mm <sup>2</sup> ) | Th17<br>TLS<br>(cells/mm <sup>2</sup> ) | Treg<br>TLS<br>(cells/mm <sup>2</sup> ) | Tfh<br>TLS<br>(cells/mm <sup>2</sup> ) | CD8<br>TLS<br>(cells/mm <sup>2</sup> ) |
|----------------|-----------------------------------------|-------------|----------------------------------------|----------------------------------------|-----------------------------------------|-----------------------------------------|----------------------------------------|----------------------------------------|
| Spearman's rho | Th1<br>TLS<br>(cells/mm <sup>2</sup> )  | Correlation | 1.000                                  | .357                                   | -.214                                   | .071                                    | .167                                   | .690                                   |
|                |                                         | P value     | .                                      | .385                                   | .610                                    | .867                                    | .693                                   | .058                                   |
|                |                                         | N           | 8                                      | 8                                      | 8                                       | 8                                       | 8                                      | 8                                      |
|                | Th2<br>TLS<br>(cells/mm <sup>2</sup> )  | Correlation |                                        | 1.000                                  | .262                                    | .381                                    | .595                                   | .238                                   |
|                |                                         | P value     |                                        | .                                      | .531                                    | .352                                    | .120                                   | .570                                   |
|                |                                         | N           |                                        | 8                                      | 8                                       | 8                                       | 8                                      | 8                                      |
|                | Th17<br>TLS<br>(cells/mm <sup>2</sup> ) | Correlation |                                        |                                        | 1.000                                   | .500                                    | .119                                   | .214                                   |
|                |                                         | P value     |                                        |                                        | .                                       | .207                                    | .779                                   | .610                                   |
|                |                                         | N           |                                        |                                        | 8                                       | 8                                       | 8                                      | 8                                      |
|                | Treg<br>TLS<br>(cells/mm <sup>2</sup> ) | Correlation |                                        |                                        |                                         | 1.000                                   | .667                                   | .214                                   |
|                |                                         | P value     |                                        |                                        |                                         | .                                       | .071                                   | .610                                   |
|                |                                         | N           |                                        |                                        |                                         | 8                                       | 8                                      | 8                                      |
|                | Tfh<br>TLS<br>(cells/mm <sup>2</sup> )  | Correlation |                                        |                                        |                                         |                                         | 1.000                                  | .095                                   |
|                |                                         | P value     |                                        |                                        |                                         |                                         | .                                      | .823                                   |
|                |                                         | N           |                                        |                                        |                                         |                                         | 8                                      | 8                                      |
|                | CD8<br>TLS<br>(cells/mm <sup>2</sup> )  | Correlation |                                        |                                        |                                         |                                         |                                        | 1.000                                  |
|                |                                         | P value     |                                        |                                        |                                         |                                         |                                        | .                                      |
|                |                                         | N           |                                        |                                        |                                         |                                         |                                        | 8                                      |

<sup>#</sup> Spearman's Rank Correlation Coefficient in IBM SPSS version 26 was used to assess the correlation between the indicated T cell populations in tertiary lymphoid structures. Value of 1 or -1 represents a perfect correlation, whereas 0 indicates no association.

None of the analyses reported in the table above had a p value <0.05.



**Supplementary Table 4. Correlation analysis of Th subsets (as percent of the total number of CD3<sup>+</sup>CD8<sup>-</sup> T cells) and CD8<sup>+</sup> T cell densities (cells/mm<sup>2</sup>) in tertiary lymphoid structures (TLS) from 8 NSCLC patients<sup>#</sup>**

| Correlations   |                                        |             | Th1<br>TLS<br>(%) | Th2<br>TLS<br>(%) | Th17<br>TLS<br>(%) | Treg<br>TLS<br>(%) | Tfh<br>TLS<br>(%) | CD8<br>TLS<br>(cells/mm <sup>2</sup> ) |
|----------------|----------------------------------------|-------------|-------------------|-------------------|--------------------|--------------------|-------------------|----------------------------------------|
| Spearman's rho | Th1<br>TLS<br>(%)                      | Correlation | 1.000             | -.095             | -.371              | .167               | -.286             | .619                                   |
|                |                                        | P value     | .                 | .823              | .365               | .693               | .493              | .102                                   |
|                |                                        | N           | 8                 | 8                 | 8                  | 8                  | 8                 | 8                                      |
|                | Th2<br>TLS<br>(%)                      | Correlation |                   | 1.000             | .240               | -.810*             | .190              | .143                                   |
|                |                                        | P value     |                   | .                 | .568               | .015               | .651              | .736                                   |
|                |                                        | N           |                   | 8                 | 8                  | 8                  | 8                 | 8                                      |
|                | Th17<br>TLS<br>(%)                     | Correlation |                   |                   | 1.000              | -.036              | -.012             | .371                                   |
|                |                                        | P value     |                   |                   | .                  | .933               | .978              | .365                                   |
|                |                                        | N           |                   |                   | 8                  | 8                  | 8                 | 8                                      |
|                | Treg<br>TLS<br>(%)                     | Correlation |                   |                   |                    | 1.000              | -.071             | .167                                   |
|                |                                        | P value     |                   |                   |                    | .                  | .867              | .693                                   |
|                |                                        | N           |                   |                   |                    | 8                  | 8                 | 8                                      |
|                | Tfh<br>TLS<br>(%)                      | Correlation |                   |                   |                    |                    | 1.000             | .143                                   |
|                |                                        | P value     |                   |                   |                    |                    | .                 | .736                                   |
|                |                                        | N           |                   |                   |                    |                    | 8                 | 8                                      |
|                | CD8<br>TLS<br>(cells/mm <sup>2</sup> ) | Correlation |                   |                   |                    |                    |                   | 1.000                                  |
|                |                                        | P value     |                   |                   |                    |                    |                   | .                                      |
|                |                                        | N           |                   |                   |                    |                    |                   | 8                                      |

<sup>#</sup> Spearman's Rank Correlation Coefficient in IBM SPSS version 26 was used to assess the correlation between percentage of the individual Th cell subsets and density of CD8<sup>+</sup> T cells in tertiary lymphoid structures. Value of 1 or -1 represents a perfect correlation, whereas 0 indicates no association.

\* p<0.05 level (2-tailed) highlighted in cyan

**Supplementary Table 5. Correlation analysis of densities (cells/mm<sup>2</sup>) of Th cell subsets and CD8<sup>+</sup> T cells in distal lung from 9 NSCLC patients<sup>#</sup>**

| Correlations   |                                                 |             | Th1<br>distal lung<br>(cells/mm <sup>2</sup> ) | Th2<br>distal lung<br>(cells/mm <sup>2</sup> ) | Th17<br>distal lung<br>(cells/mm <sup>2</sup> ) | Treg<br>distal lung<br>(cells/mm <sup>2</sup> ) | Tfh<br>distal lung<br>(cells/mm <sup>2</sup> ) | CD8<br>distal lung<br>(cells/mm <sup>2</sup> ) |
|----------------|-------------------------------------------------|-------------|------------------------------------------------|------------------------------------------------|-------------------------------------------------|-------------------------------------------------|------------------------------------------------|------------------------------------------------|
| Spearman's rho | Th1<br>distal lung<br>(cells/mm <sup>2</sup> )  | Correlation | 1.000                                          | -.322                                          | .276                                            | .483                                            | .797**                                         | .600                                           |
|                |                                                 | P value     | .                                              | .398                                           | .472                                            | .187                                            | .010                                           | .088                                           |
|                |                                                 | N           | 9                                              | 9                                              | 9                                               | 9                                               | 9                                              | 9                                              |
|                | Th2<br>distal lung<br>(cells/mm <sup>2</sup> )  | Correlation |                                                | 1.000                                          | -.562                                           | -.237                                           | -.362                                          | -.661                                          |
|                |                                                 | P value     |                                                | .                                              | .115                                            | .539                                            | .338                                           | .053                                           |
|                |                                                 | N           |                                                | 9                                              | 9                                               | 9                                               | 9                                              | 9                                              |
|                | Th17<br>distal lung<br>(cells/mm <sup>2</sup> ) | Correlation |                                                |                                                | 1.000                                           | -.075                                           | .136                                           | .293                                           |
|                |                                                 | P value     |                                                |                                                | .                                               | .847                                            | .727                                           | .444                                           |
|                |                                                 | N           |                                                |                                                | 9                                               | 9                                               | 9                                              | 9                                              |
|                | Treg<br>distal lung<br>(cells/mm <sup>2</sup> ) | Correlation |                                                |                                                |                                                 | 1.000                                           | .475                                           | .233                                           |
|                |                                                 | P value     |                                                |                                                |                                                 | .                                               | .197                                           | .546                                           |
|                |                                                 | N           |                                                |                                                |                                                 | 9                                               | 9                                              | 9                                              |
|                | Tfh<br>distal lung<br>(cells/mm <sup>2</sup> )  | Correlation |                                                |                                                |                                                 |                                                 | 1.000                                          | .475                                           |
|                |                                                 | P value     |                                                |                                                |                                                 |                                                 | .                                              | .197                                           |
|                |                                                 | N           |                                                |                                                |                                                 |                                                 | 9                                              | 9                                              |
|                | CD8<br>distal lung<br>(cells/mm <sup>2</sup> )  | Correlation |                                                |                                                |                                                 |                                                 |                                                | 1.000                                          |
|                |                                                 | P value     |                                                |                                                |                                                 |                                                 |                                                | .                                              |
|                |                                                 | N           |                                                |                                                |                                                 |                                                 |                                                | 9                                              |

<sup>#</sup> Spearman's Rank Correlation Coefficient in IBM SPSS version 26 was used to assess the correlation between densities (cells/mm<sup>2</sup>) of the indicated T cell populations in distal lung tissue. Value of 1 or -1 represents a perfect correlation, whereas 0 indicates no association.

\*\* p<0.01 level (2-tailed) highlighted in yellow

**Supplementary Table 6. Correlation analysis of Th cell subsets (as percent of the total number of CD3<sup>+</sup>CD8<sup>-</sup> T cells) and CD8<sup>+</sup> T cell densities (cells/mm<sup>2</sup>) in distal lung from 9 NSCLC patients<sup>#</sup>**

| Correlations   |                                                |             | Th1<br>distal lung<br>(%) | Th2<br>distal lung<br>(%) | Th17<br>distal lung<br>(%) | Treg<br>distal lung<br>(%) | Tfh<br>distal lung<br>(%) | CD8<br>distal lung<br>(cells/mm <sup>2</sup> ) |
|----------------|------------------------------------------------|-------------|---------------------------|---------------------------|----------------------------|----------------------------|---------------------------|------------------------------------------------|
| Spearman's rho | Th1<br>distal lung<br>(%)                      | Correlation | 1.000                     | .238                      | <b>.720*</b>               | .533                       | -.373                     | -.317                                          |
|                |                                                | P value     | .                         | .537                      | .029                       | .139                       | .323                      | .406                                           |
|                |                                                | N           | 9                         | 9                         | 9                          | 9                          | 9                         | 9                                              |
|                | Th2<br>distal lung<br>(%)                      | Correlation |                           | 1.000                     | -.209                      | .179                       | -.355                     | <b>-.698*</b>                                  |
|                |                                                | P value     |                           | .                         | .589                       | .645                       | .349                      | .037                                           |
|                |                                                | N           |                           | 9                         | 9                          | 9                          | 9                         | 9                                              |
|                | Th17<br>distal lung<br>(%)                     | Correlation |                           |                           | 1.000                      | .268                       | -.213                     | -.059                                          |
|                |                                                | P value     |                           |                           | .                          | .486                       | .583                      | .881                                           |
|                |                                                | N           |                           |                           | 9                          | 9                          | 9                         | 9                                              |
|                | Treg<br>distal lung<br>(%)                     | Correlation |                           |                           |                            | 1.000                      | .390                      | -.550                                          |
|                |                                                | P value     |                           |                           |                            | .                          | .300                      | .125                                           |
|                |                                                | N           |                           |                           |                            | 9                          | 9                         | 9                                              |
|                | Tfh<br>distal lung<br>(%)                      | Correlation |                           |                           |                            |                            | 1.000                     | .051                                           |
|                |                                                | P value     |                           |                           |                            |                            | .                         | .897                                           |
|                |                                                | N           |                           |                           |                            |                            | 9                         | 9                                              |
|                | CD8<br>distal lung<br>(cells/mm <sup>2</sup> ) | Correlation |                           |                           |                            |                            |                           | 1.000                                          |
|                |                                                | P value     |                           |                           |                            |                            |                           | .                                              |
|                |                                                | N           |                           |                           |                            |                            |                           | 9                                              |

<sup>#</sup> Spearman's Rank Correlation Coefficient in IBM SPSS version 26 was used to assess the correlation in distal lung between the percentages of individual Th cell subsets and the density of CD8<sup>+</sup> T cells. Value of 1 or -1 represents a perfect correlation, whereas 0 indicates no association.

\* p<0.05 level (2-tailed) highlighted in cyan

**Supplementary Table 7. Protocols for multiplex chromogenic IHC for detection of Th cell subsets in human tumors**

| STEPS                                     | Th1 cell stain                                            | Th2 cell stain (clone L50-816)                            | Th2 cell stain (clone D13C9)                              | Treg cell stain                                           | Th17 cell stain                                           | Tfh cell stain                                            |
|-------------------------------------------|-----------------------------------------------------------|-----------------------------------------------------------|-----------------------------------------------------------|-----------------------------------------------------------|-----------------------------------------------------------|-----------------------------------------------------------|
| 1. Deparaffinization cycle (time)         | manual                                                    | 3 (24 min)                                                | 3 (24 min)                                                | 3 (24 min)                                                | 3 (24 min)                                                | 3 (24 min)                                                |
| 2. Pretreatment/antigen retrieval (time)  | Tris-EDTA pH=9 (20 min) manual                            | CC1 (56 min)                                              | CC1 (56 min)                                              | CC1 (56 min)                                              | CC1 (56 min)                                              | CC1 (56 min)                                              |
| 3. Peroxidase block (time)                | Peroxidase-blocking (5 min) manual                        | DISCOVERY Inhibitor (8 min)                               | DISCOVERY Inhibitor (8 min)                               | DISCOVERY Inhibitor (8 min)                               | DISCOVERY Inhibitor (8 min)                               | DISCOVERY Inhibitor (8 min)                               |
| 4. Peroxidase block (time)                | -                                                         | Inhibitor CM (8 min)                                      | Inhibitor CM (8 min)                                      | Inhibitor CM (8 min)                                      | Inhibitor CM (8 min)                                      | Inhibitor CM (8 min)                                      |
| 5. Protein block (time)                   | Protein block (20 min) manual                             | -                                                         | -                                                         | -                                                         | -                                                         | -                                                         |
| 6. Primary antibody (time)                | T-bet: overnight at 4 °C manual                           | GATA-3, clone L50-816 (32 min)                            | GATA-3, clone D13C9 (60 min)                              | FOXP3 (32 min)                                            | ROR-γt (60 min)                                           | BCL-6 (32 min)                                            |
| 7. Secondary antibody (time)              | EnVision™ FLEX/HRP (30 min) manual                        | HQ anti-mouse (16 min)                                    | HQ anti-rabbit (20 min)                                   | HQ anti-mouse (16 min)                                    | HQ anti-mouse (20 min)                                    | HQ anti-mouse (16 min)                                    |
| 8. Secondary antibody (time)              | -                                                         | anti-HQ (16 min)                                          | anti-HQ (20 min)                                          | anti-HQ (16 min)                                          | anti-HQ (16 min)                                          | anti-HQ (16 min)                                          |
| 9. Substrate                              | HRP                                                       | HRP                                                       | HRP                                                       | HRP                                                       | HRP                                                       | HRP                                                       |
| 10. Chromogen (time)                      | DAB (5 min) manual                                        | DAB (default)                                             | DAB (default)                                             | DAB (default)                                             | DAB (default)                                             | DAB (default)                                             |
| 11. Ribo CC (CC2) (temperature, time)     | -                                                         | 100 °C, 24 min                                            | 100 °C, 24 min                                            | 100 °C, 24 min                                            | 100 °C, 24 min                                            | 100 °C, 24 min                                            |
| 12. Peroxidase block (time)               | DISCOVERY Inhibitor (8 min)                               | -                                                         | -                                                         | -                                                         | -                                                         | -                                                         |
| 13. Primary antibody (time)               | CD8 (32 min)                                              | CD8 (32 min)                                              | CD8 (32 min)                                              | CD8 (32 min)                                              | CD8 (32 min)                                              | CD8 (32 min)                                              |
| 14. Secondary antibody (time)             | anti-rabbit OmniMap (16 min)                              | anti-rabbit OmniMap (16 min)                              | anti-rabbit OmniMap (16 min)                              | anti-rabbit OmniMap (16 min)                              | anti-rabbit OmniMap (16 min)                              | anti-rabbit OmniMap (16 min)                              |
| 15. Substrate                             | HRP                                                       | HRP                                                       | HRP                                                       | HRP                                                       | HRP                                                       | HRP                                                       |
| 16. Chromogen (time)                      | Purple (32 min)                                           | Purple (32 min)                                           | Purple (32 min)                                           | Purple (32 min)                                           | Purple (32 min)                                           | Purple (32 min)                                           |
| 17. Ribo CC (CC2) (temperature, time)     | 100 °C, 24 min                                            | 100 °C, 24 min                                            | 100 °C, 24 min                                            | 100 °C, 24 min                                            | 100 °C, 24 min                                            | 100 °C, 24 min                                            |
| 18. Primary antibody (time)               | CD3 (44 min)                                              | CD3 (44 min)                                              | CD3 (44 min)                                              | CD3 (44 min)                                              | CD3 (44 min)                                              | CD3 (44 min)                                              |
| 19. Secondary antibody (time)             | anti-rabbit HQ (16 min)                                   | anti-rabbit HQ (16 min)                                   | anti-rabbit HQ (16 min)                                   | anti-rabbit HQ (16 min)                                   | anti-rabbit HQ (16 min)                                   | anti-rabbit HQ (16 min)                                   |
| 20. Secondary antibody (time)             | anti-HQ (16 min)                                          | anti-HQ (16 min)                                          | anti-HQ (16 min)                                          | anti-HQ (16 min)                                          | anti-HQ (16 min)                                          | anti-HQ (16 min)                                          |
| 21. Substrate                             | HRP                                                       | HRP                                                       | HRP                                                       | HRP                                                       | HRP                                                       | HRP                                                       |
| 22. Chromogen (time)                      | Teal (H <sub>2</sub> O <sub>2</sub> :32 min) (Act:16 min) | Teal (H <sub>2</sub> O <sub>2</sub> :32 min) (Act:16 min) | Teal (H <sub>2</sub> O <sub>2</sub> :32 min) (Act:16 min) | Teal (H <sub>2</sub> O <sub>2</sub> :32 min) (Act:16 min) | Teal (H <sub>2</sub> O <sub>2</sub> :32 min) (Act:16 min) | Teal (H <sub>2</sub> O <sub>2</sub> :32 min) (Act:16 min) |
| 23. Ribo CC (CC2) (temperature, time)     | 100 °C, 24 min                                            | 100 °C, 24 min                                            | 100 °C, 24 min                                            | 100 °C, 24 min                                            | 100 °C, 24 min                                            | 100 °C, 24 min                                            |
| 24. Pretreatment/antigen retrieval (time) | Protease 3 (4 min)                                        | Protease 3 (4 min)                                        | Protease 3 (4 min)                                        | Protease 3 (4 min)                                        | Protease 3 (4 min)                                        | Protease 3 (4 min)                                        |
| 25. Primary antibody (time)               | Cytokeratin (20 min)                                      | Cytokeratin (20 min)                                      | Cytokeratin (20 min)                                      | Cytokeratin (20 min)                                      | Cytokeratin (20 min)                                      | Cytokeratin (20 min)                                      |
| 26. Secondary antibody (time)             | anti-mouse UltraMap (16 min)                              | anti-mouse UltraMap (16 min)                              | anti-mouse UltraMap (16 min)                              | anti-mouse UltraMap (16 min)                              | anti-mouse UltraMap (16 min)                              | anti-mouse UltraMap (16 min)                              |
| 27. Enzyme                                | AP                                                        | AP                                                        | AP                                                        | AP                                                        | AP                                                        | AP                                                        |
| 28. Chromogen (time)                      | Yellow (60 min)                                           | Yellow (60 min)                                           | Yellow (60 min)                                           | Yellow (60 min)                                           | Yellow (60 min)                                           | Yellow (60 min)                                           |
| 29. Manual counterstain (hematoxylin)     | 1 min                                                     | 1 min                                                     | 1 min                                                     | 1 min                                                     | 1 min                                                     | 1 min                                                     |

An autostainer Ventana Discovery Ultra system was used for multiplex immunohistochemistry.

Abbreviations: Act, activator; AP, alkaline phosphatase; CC1, cell conditioning 1; CC2, cell conditioning 2; DAB, 3,3'-diaminobenzidine; HRP, horseradish peroxidase; HQ, hydroxyquinazoline

**Supplementary Table 8. List of primary monoclonal antibodies (mAbs) used to detect T cell subsets and lung carcinoma cells by IHC**

| Specificity of primary antibody | mAb clone      | Species/ Isotype  | Dilution (µg/ml)    | Supplier                 | Cat. No.   | Incubation time   | Isotype-matched control mAbs |          |
|---------------------------------|----------------|-------------------|---------------------|--------------------------|------------|-------------------|------------------------------|----------|
|                                 |                |                   |                     |                          |            |                   | Supplier                     | Cat. No. |
| T-bet                           | 4B10           | Mouse IgG1        | 1:700 (0.28)        | Santa Cruz Biotechnology | sc-21749   | Overnight at 4 °C | Dako                         | X0931    |
| GATA-3                          | L50-816        | Mouse IgG1        | ready to use (1.84) | Roche                    | 760-4897   | 32 min            | Dako                         | X0931    |
| GATA-3                          | D13C9          | Rabbit IgG        | 1:100 (5.0)         | CellSignalling           | 5852       | 60 min            | Vector Laboratories          | I-1000   |
| ROR-gt                          | 6F3.1          | Mouse IgG2a       | 1:100 (10.0)        | EMD Millipore            | MABF81     | 56 min            | Dako                         | X0943    |
| Bcl6                            | Gi191/A8       | Mouse IgG1        | ready to use (0.3)  | Roche                    | 760-4241   | 32 min            | Dako                         | X0931    |
| Foxp3                           | 236A/E7        | Mouse IgG1        | 1:100 (5.0)         | Invitrogen               | 14-4777-82 | 56 min            | Dako                         | X0931    |
| CD3                             | 2GV6           | Rabbit monoclonal | ready to use (0.40) | Roche                    | 790-4341   | 44 min            | Vector Laboratories          | I-1000   |
| CD8                             | SP57           | Rabbit monoclonal | ready to use (0.35) | Roche                    | 790-4460   | 32 min            | Vector Laboratories          | I-1000   |
| Cyto-keratin                    | AE1/AE3/ PCK26 | Mouse IgG1        | ready to use (48.0) | Roche                    | 760-2135   | 20 min            | Dako                         | X0931    |

**Supplementary Table 9. List of secondary antibodies used for IHC**

| Target of primary antibody        | Secondary antibodies                 | Dilution     | Supplier | Cat. No.                   | Incubation time        |
|-----------------------------------|--------------------------------------|--------------|----------|----------------------------|------------------------|
| T-bet mouse IgG1                  | EnVision™ FLEX/ HRP                  | Ready to use | Dako     | DM822                      | 30 min                 |
| GATA-3 mouse IgG1 (clone L50-816) | 1. HQ anti-mouse<br>2. HRP anti-HQ   | Ready to use | Roche    | 1. 760-4814<br>2. 760-4820 | 1. 16 min<br>2. 16 min |
| GATA-3 rabbit IgG (clone D13C9)   | 1. HQ anti-rabbit<br>2. HRP anti-HQ  | Ready to use | Roche    | 1. 760-4815<br>2. 760-4820 | 1. 20 min<br>2. 20 min |
| ROR-γt mouse IgG2a                | 1. HQ anti-mouse<br>2. HRP anti-HQ   | Ready to use | Roche    | 1. 760-4814<br>2. 760-4820 | 1. 20 min<br>2. 16 min |
| Bcl6 mouse IgG1                   | 1. HQ anti-mouse<br>2. HRP anti-HQ   | Ready to use | Roche    | 1. 760-4814<br>2. 760-4820 | 1. 16 min<br>2. 16 min |
| Foxp3 mouse IgG1                  | 1. HQ anti-mouse<br>2. HRP anti-HQ   | Ready to use | Roche    | 1. 760-4814<br>2. 760-4820 | 1. 16 min<br>2. 16 min |
| CD3 rabbit IgG                    | 1. HQ anti-rabbit<br>2. HRP anti-HQ  | Ready to use | Roche    | 1. 760-4815<br>2. 760-4820 | 1. 16 min<br>2. 16 min |
| CD8 rabbit IgG                    | DISCOVERY anti-rabbit<br>OmniMap HRP | Ready to use | Roche    | 760-4311                   | 16 min                 |
| Cytokeratin mouse IgG1            | DISCOVERY anti-mouse<br>UltraMap AP  | Ready to use | Roche    | 760-4312                   | 16 min                 |

Abbreviations: AP, alkaline phosphatase; HRP, horseradish peroxidase; NP, hapten nitroprazole; HQ, hydroxyquinazoline; mAb, monoclonal antibody

**Supplementary Table 10. List of reagents used for multiplex chromogenic IHC**

| Reagents used in IHC                                 | Supplier                    | Cat. No.   |
|------------------------------------------------------|-----------------------------|------------|
| Tween 20                                             | Sigma-Aldrich               | P2287      |
| HyClone Dulbecco's Phosphate Buffered Saline: Powder | GE Healthcare Life Sciences | SH30013.03 |
| CC1 (cell conditioning 1)                            | Roche                       | 950-124    |
| Ribo CC (CC2)                                        | Roche                       | 760-107    |
| Tris-EDTA (pH=9)                                     | Dako, Agilent               | K8004      |
| Protease 3                                           | Roche                       | 760-2020   |
| DISCOVERY Inhibitor                                  | Roche                       | 760-4840   |
| Inhibitor CM                                         | Roche                       | 760-124    |
| EnVision™ FLEX Peroxidase-blocking Reagent           | Dako, Agilent               | DM821      |
| Protein block                                        | Dako, Agilent               | X0909      |
| DISCOVERY DAB Map Detection kit                      | Roche                       | 760-124    |
| DISCOVERY Purple Detection kit                       | Roche                       | 760-229    |
| DISCOVERY Teal Detection kit                         | Roche                       | 760-247    |
| DISCOVERY Yellow Detection kit                       | Roche                       | 760-239    |
| DAKO Liquid DAB+ Substrate Chromogen System          | Dako, Agilent               | K3468      |

**Supplementary Table 11. List of primary antibodies used for immunofluorescence**

| Primary antibodies | Clone      | Species/isotype | Dilution (µg/ml)    | Supplier          | Cat. No.   | Antigen retrieval | Isotype-matched control mAbs |          |
|--------------------|------------|-----------------|---------------------|-------------------|------------|-------------------|------------------------------|----------|
|                    |            |                 |                     |                   |            |                   | Supplier                     | Cat. No. |
| CCR4               | Polyclonal | Rabbit IgG      | 1:50 (2.0)          | Sigma-Aldrich     | HPA031613  | Citrate (pH 6.0)  | Vector Laboratories          | I-1000   |
| CXCR3              | 49801      | Mouse IgG1      | 1:200 (2.5)         | R&D systems       | MAB160-100 | Citrate (pH 6.0)  | Dako                         | X0931    |
| CD3                | 2GV6       | Mouse IgG1      | ready to use (0.40) | Roche             | 790-4341   | Citrate (pH 6.0)  | Dako                         | X0931    |
| CD3                | F7.2.38    | Rabbit IgG      | 1:50 (5.0)          | Abcam             | ab17143    | Citrate (pH 6.0)  | Vector Laboratories          | I-1000   |
| CD8                | 4B11       | Mouse IgG2b     | 1:50 (5.0)          | Thermo Scientific | MA1-80231  | Citrate (pH 6.0)  | Biolegend                    | 400301   |

**Supplementary Table 12. List of secondary antibodies used for immunofluorescence**

| Target of primary antibody | Species/isotype for primary antibodies | Fluorochrome    | Species | Dilution | Supplier         | Cat. No. |
|----------------------------|----------------------------------------|-----------------|---------|----------|------------------|----------|
| CCR4                       | Rabbit IgG                             | Alexa Fluor 647 | Donkey  | 1:500    | Molecular Probes | A-31573  |
| CXCR3                      | Mouse IgG1                             | Alexa Fluor 488 | Goat    | 1:500    | Molecular Probes | A-21121  |
| CD3                        | Mouse IgG1                             | Alexa Fluor 488 | Goat    | 1:500    | Molecular Probes | A-21121  |
| CD3                        | Rabbit IgG                             | Alexa Fluor 647 | Donkey  | 1:500    | Molecular Probes | A-31573  |
| CD8                        | Mouse IgG2b                            | Alexa Fluor 555 | Goat    | 1:500    | Molecular Probes | A-21147  |

**Supplementary Table 13. List of reagents used for immunofluorescence**

| Reagents used in IHC                                 | Supplier                    | Cat. No.   |
|------------------------------------------------------|-----------------------------|------------|
| Citrate buffer pH 6                                  | Dako, Agilent               | S1699      |
| Protein block                                        | Dako, Agilent               | X0909      |
| Bovine Albumin                                       | BioRad                      | 805090     |
| Tween 20                                             | Sigma-Aldrich               | P2287      |
| HyClone Dulbecco's Phosphate Buffered Saline: Powder | GE Healthcare Life Sciences | SH30013.03 |



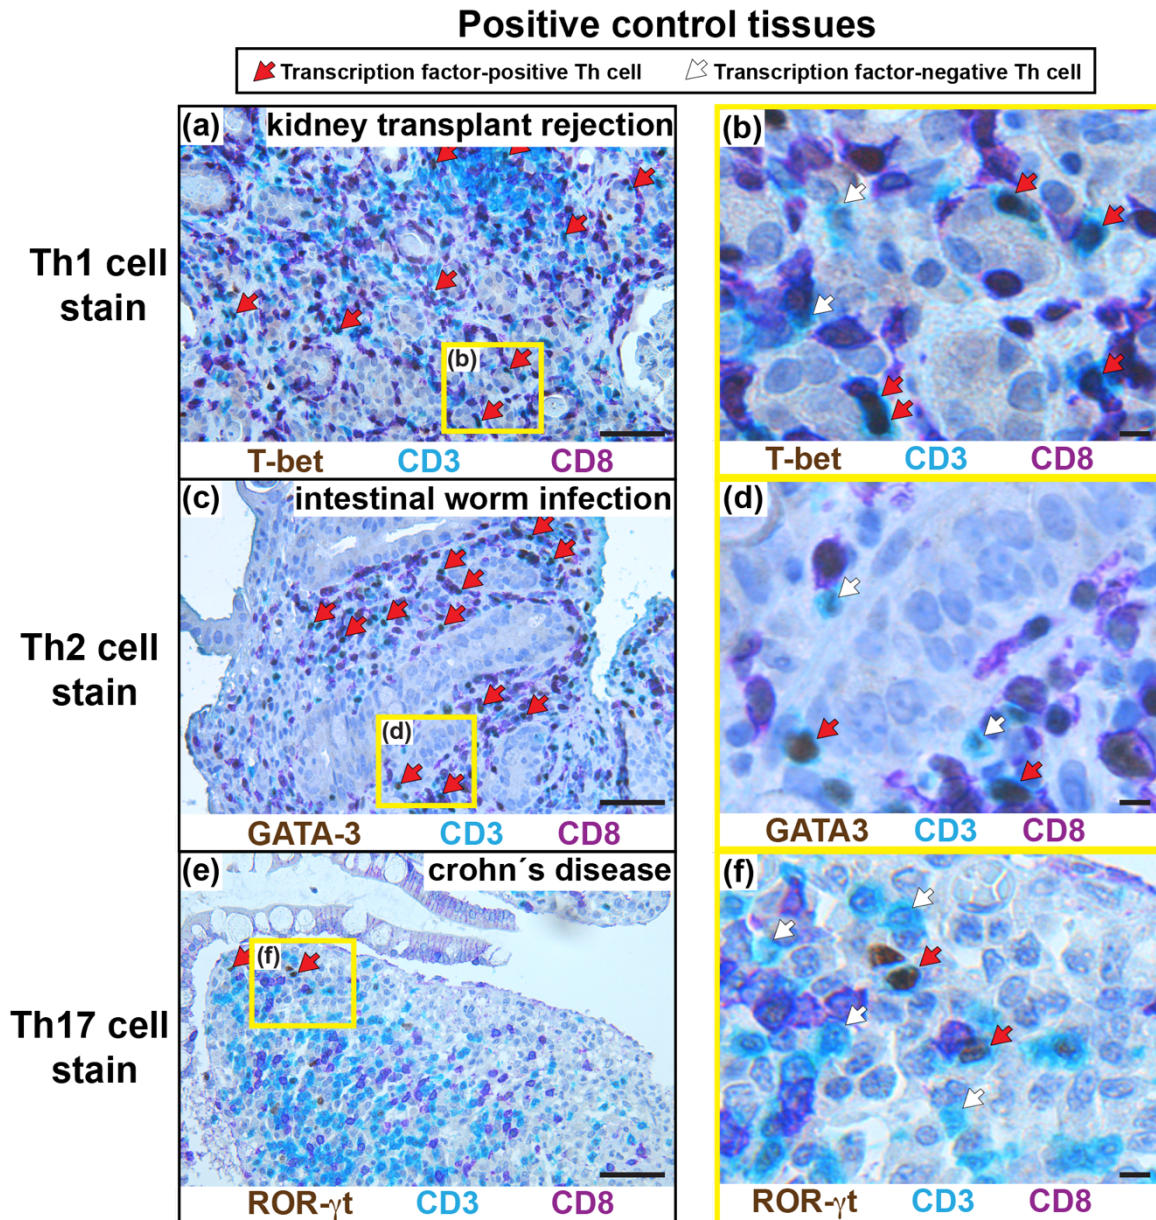

**Supplementary Figure 1. Validation of multiplex IHC of Th1, Th2 and Th17 cell subsets using positive tissue controls.** Tissues that were expected to contain high numbers of particular T cell subsets were selected and representative images are shown: (a, b) tissue of kidney transplant rejection for Th1 cells (T-bet<sup>+</sup>CD3<sup>+</sup>CD8<sup>-</sup>); (c, d) intestinal tissue with worm infection for Th2 cells (GATA-3<sup>+</sup>CD3<sup>+</sup>CD8<sup>-</sup>) identified by the anti-GATA-3 mAb clone L50-816; (e, f) gut tissue from a patient with Crohn's disease for Th17 cells (ROR-γt<sup>+</sup>CD3<sup>+</sup>CD8<sup>-</sup>). (a-f) T cells were immunostained with anti-CD3 (teal) and anti-CD8 (purple) mAbs, and all Th cells were identified as CD3<sup>+</sup>CD8<sup>-</sup>. Th subsets were detected using mAbs against subset-defining transcription factors (brown). Arrows indicate examples of positive and negative cells: red arrows point at transcription factor-positive Th cells (teal cells with brown nuclei), and white arrows point at transcription factor-negative Th cells (teal cells with hematoxylin-stained purplish blue nuclei). The squared areas indicated in yellow in (a, c, e) are shown in (b, d, f) with higher magnification. Original magnification, 400x. (a, c, e) Scale bars, 50 µm. (b, d, f) Scale bars, 5 µm.



## Positive control tissues

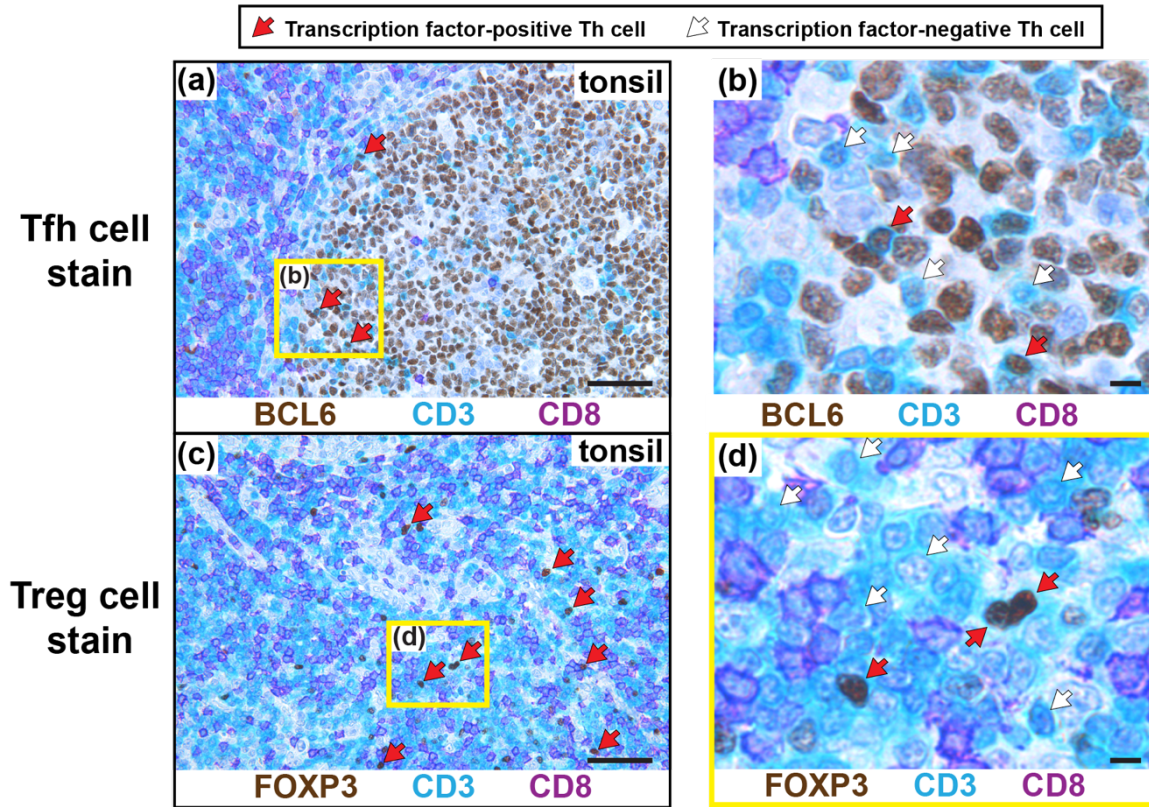

**Supplementary Figure 2. Validation of multiplex IHC of Tfh and Treg cell subsets using positive tissue controls.** Tonsil tissue that is expected to contain high numbers of Tfh and Treg cells was selected, and representative images are shown. T cells were immunostained with anti-CD3 (teal) and anti-CD8 (purple) mAbs, and all Th cells were identified as CD3<sup>+</sup>CD8<sup>-</sup>. Th subsets were detected using mAbs against subset-defining transcription factors (brown). Arrows indicate examples of positive and negative cells: red arrows point at transcription factor-positive Th cells (teal cells with brown nuclei), and white arrows point at transcription factor-negative Th cells (teal cells with hematoxylin-stained purplish blue nuclei). **(a, b)** Tfh cells (BCL6<sup>+</sup>CD3<sup>+</sup>CD8<sup>-</sup>) in tonsil. **(c, d)** Treg cells (FOXP3<sup>+</sup>CD3<sup>+</sup>CD8<sup>-</sup>) in tonsil. The squared areas indicated in yellow in **(a, c)** are shown in **(b, d)** with higher magnification. Original magnification, 400x. **(a, c)** Scale bars, 50  $\mu$ m. **(b, d)** Scale bars, 5  $\mu$ m.

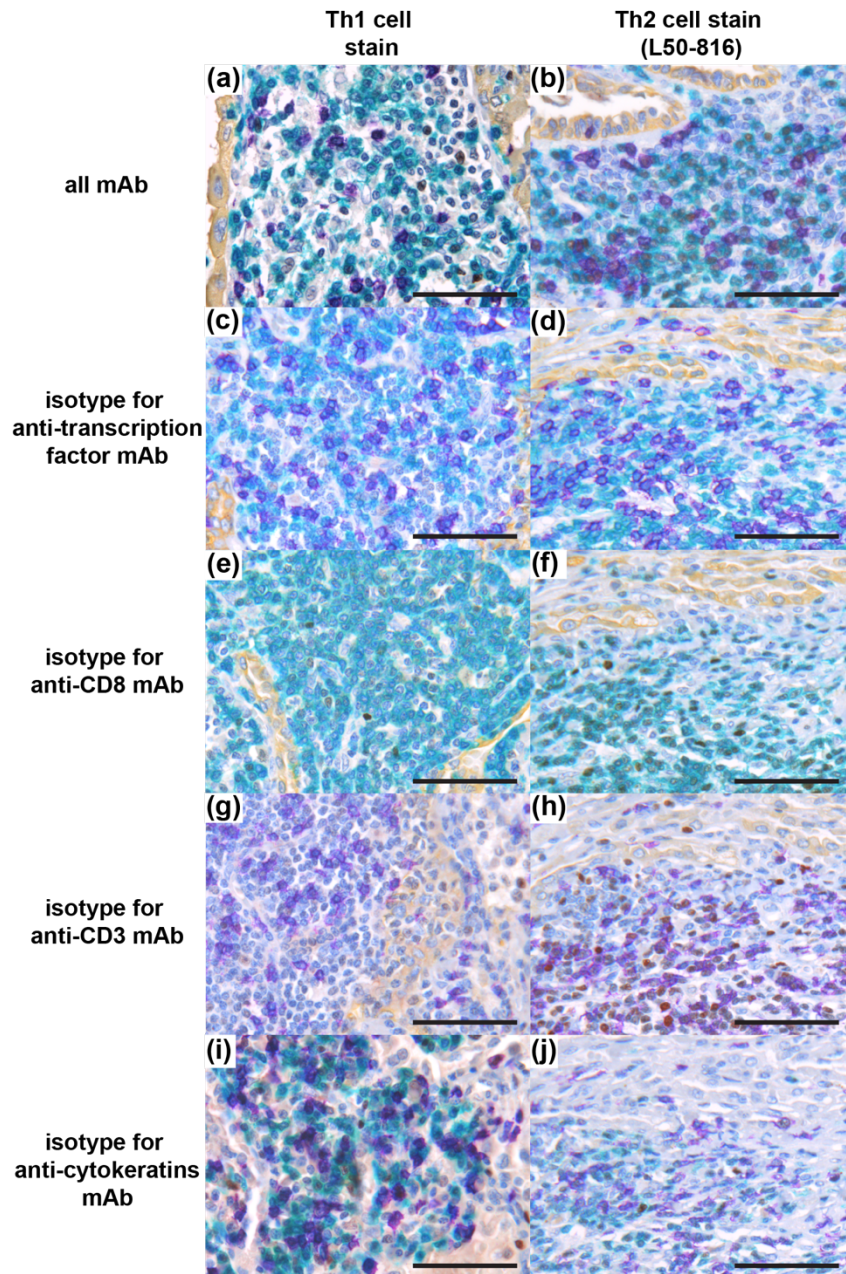

**Supplementary Figure 3. Isotype-matched antibodies with irrelevant specificity as controls for multiplex IHC of Th1 and Th2 subsets.** (a, b) Positive controls: detection of Th1 cells (a) and Th2 cells (b) in NSCLC tumors using the established multiplex IHC assay (all antibodies). (c-j) Each antibody of the assay was replaced by an isotype-matched control mAb with irrelevant specificity: (c) mouse IgG1 mAb for anti-T-bet mAb clone 4B10; (d) mouse IgG1 mAb for anti-GATA-3 mAb clone L50-816; (e, f) rabbit IgG mAb for anti-CD8 mAb clone SP57; (g, h) rabbit IgG mAb for anti-CD3 mAb clone 2GV6; (i, j) mouse IgG1 mAb for anti-cytokeratins mAb clones AE1/AE3/PCK26. The representative images shown above illustrate the absence of non-specific background staining of the tumor sections by the isotype-matched control antibodies. Original magnification, 400x. Scale bars, 50  $\mu$ m.



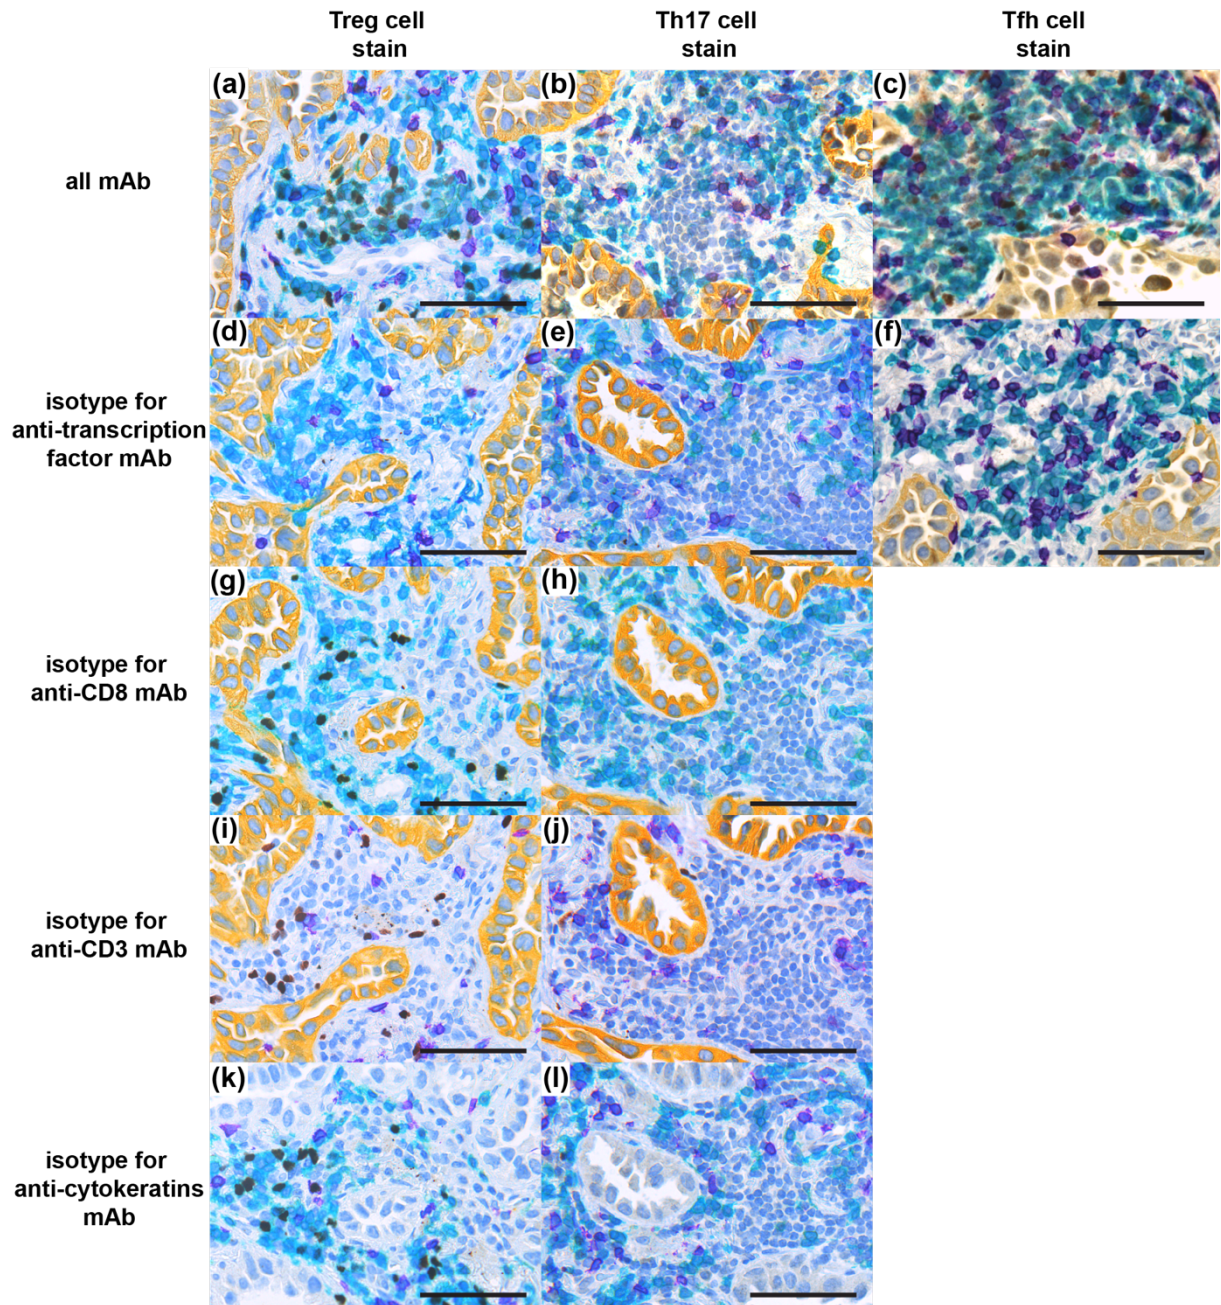

**Supplementary Figure 4. Isotype-matched antibodies with irrelevant specificity as controls for multiplex IHC of Treg, Th17 and Tfh subsets.** (a, b, c) Positive controls: detection of Treg cells (a), Th17 cells (b), and Tfh cells (c) in NSCLC tumors using the established multiplex IHC assay (all antibodies). (d-l) Each antibody of the assay was replaced by an isotype-matched control mAb with irrelevant specificity: (d) mouse IgG1 mAb for anti-FOXP3 mAb clone 236A/E7; (e) mouse IgG2a mAb for anti-ROR- $\gamma$ t mAb clone 6F3.1; (f) mouse IgG1 mAb for anti-BCL6 mAb clone Gi191/A8; (g, h) rabbit IgG mAb for anti-CD8 mAb clone SP57; (i, j) rabbit IgG mAb for anti-CD3 mAb clone 2GV6; (k, l) mouse IgG1 mAb for anti-cytokeratins mAb clones AE1/AE3/PCK26. The representative images shown above illustrate the absence of non-specific background staining of the tumor sections by the isotype-matched control antibodies. Original magnification, 400x. Scale bars, 50  $\mu$ m.



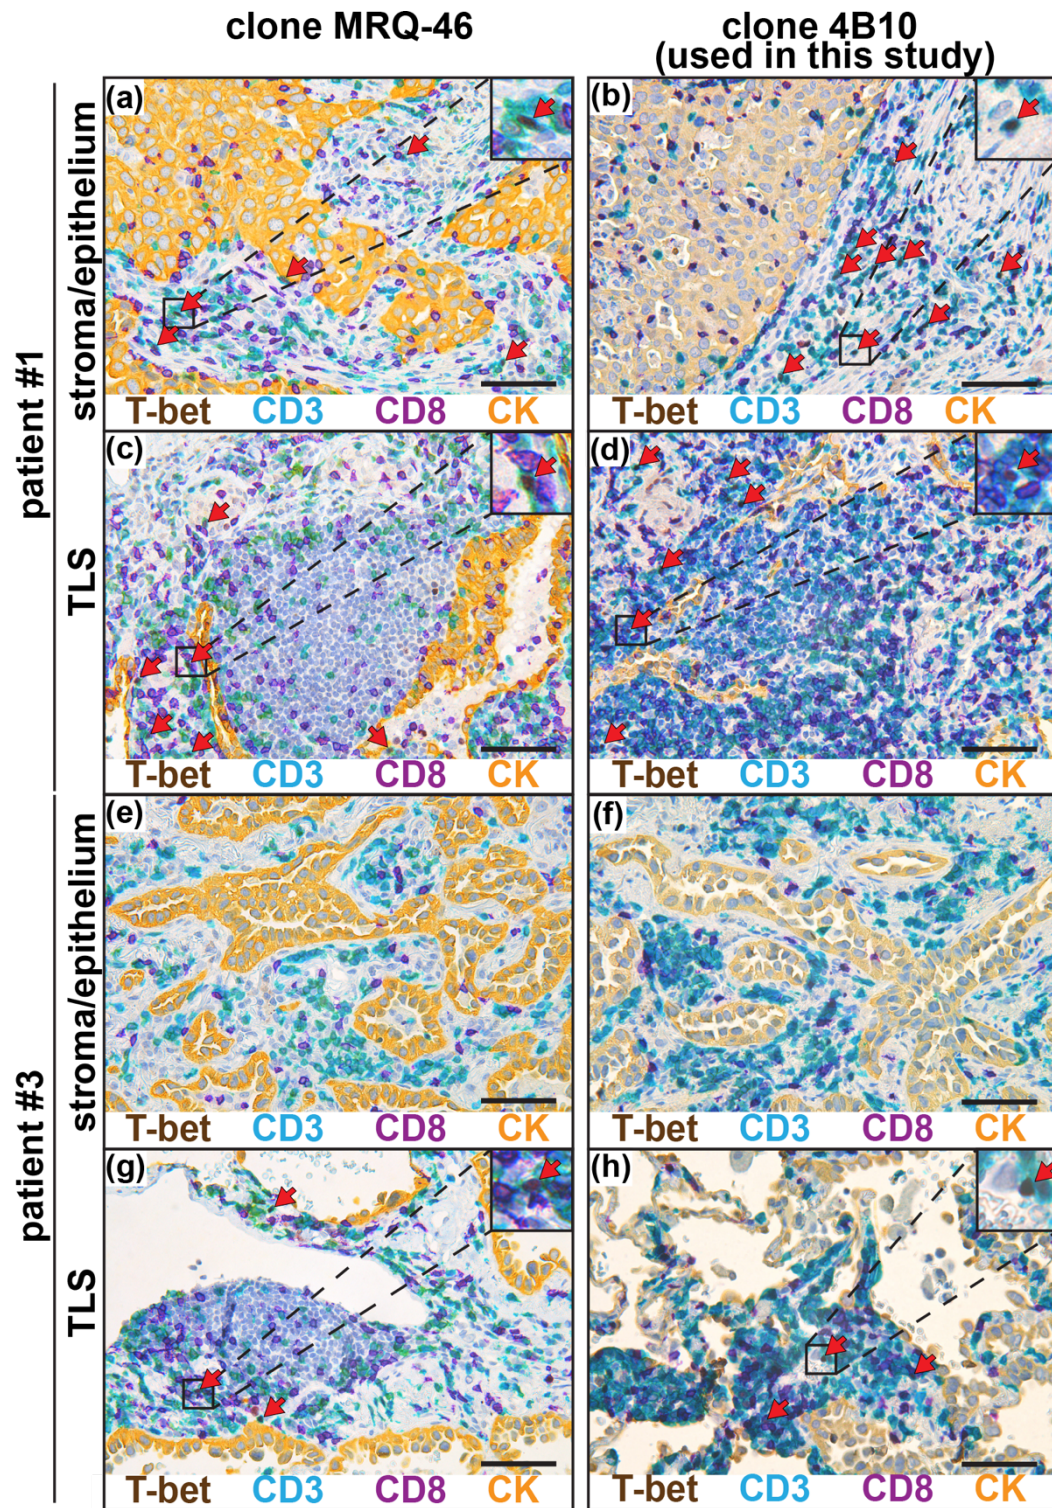

**Supplementary Figure 5. Validation of the anti-T-bet mAb using another clone.** Representative images of serial immunostained sections from two lung adenocarcinoma patients. Boxed areas are enlarged and presented as corner insets to show positively stained Th cells. Th1 cells identified as teal colored cells with brown nuclei (T-bet<sup>+</sup>CD3<sup>+</sup>CD8<sup>-</sup>) are indicated with red arrows. The tissue sections were incubated with (a, c, e, g) the anti-T-bet mAb clone MRQ-46 or (b, d, f, h) the anti-T-bet mAb clone 4B10. Clone 4B10 was used for the established multiplex IHC assay. The images shown above reveal that the two anti-T-bet mAb clones detect similar numbers of Th1 cells per mm<sup>2</sup>. TLS, tertiary lymphoid structure. CK, cytokeratin. Original magnification, 400x. Scale bars, 50  $\mu$ m.



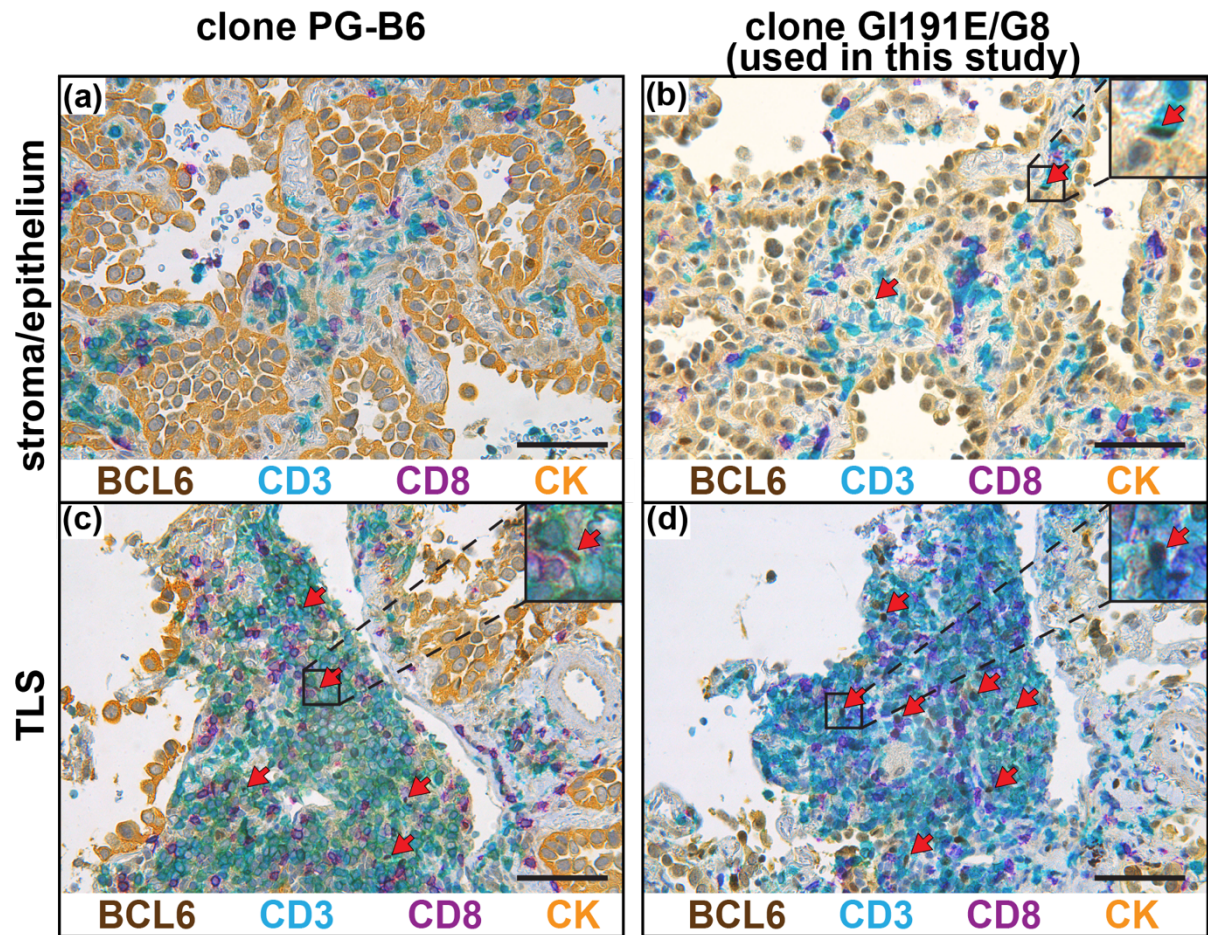

**Supplementary Figure 6. Validation of the anti-BCL6 mAb using another clone. (a-d)** Representative images of serial immunostained sections from one lung adenocarcinoma patient. Boxed areas are enlarged and presented as corner insets to show positively stained Tfh cells. Tfh cells identified as teal colored cells with brown nuclei ( $BCL6^{+}CD3^{+}CD8^{-}$ ) are indicated with red arrows. The tissue sections were incubated with **(a, c)** anti-BCL6 mAb clone PG-B6, or **(b, d)** anti-BCL6 mAb clone GI191E/G8. Clone GI191E/G8 was used for the established multiplex IHC assay. The images shown above reveal that the two anti-BCL6 mAb clones detect similar numbers of Tfh cells per  $mm^2$ . TLS, tertiary lymphoid structure. CK, cytokeratin. Original magnification, 400x. Scale bars, 50  $\mu m$ .

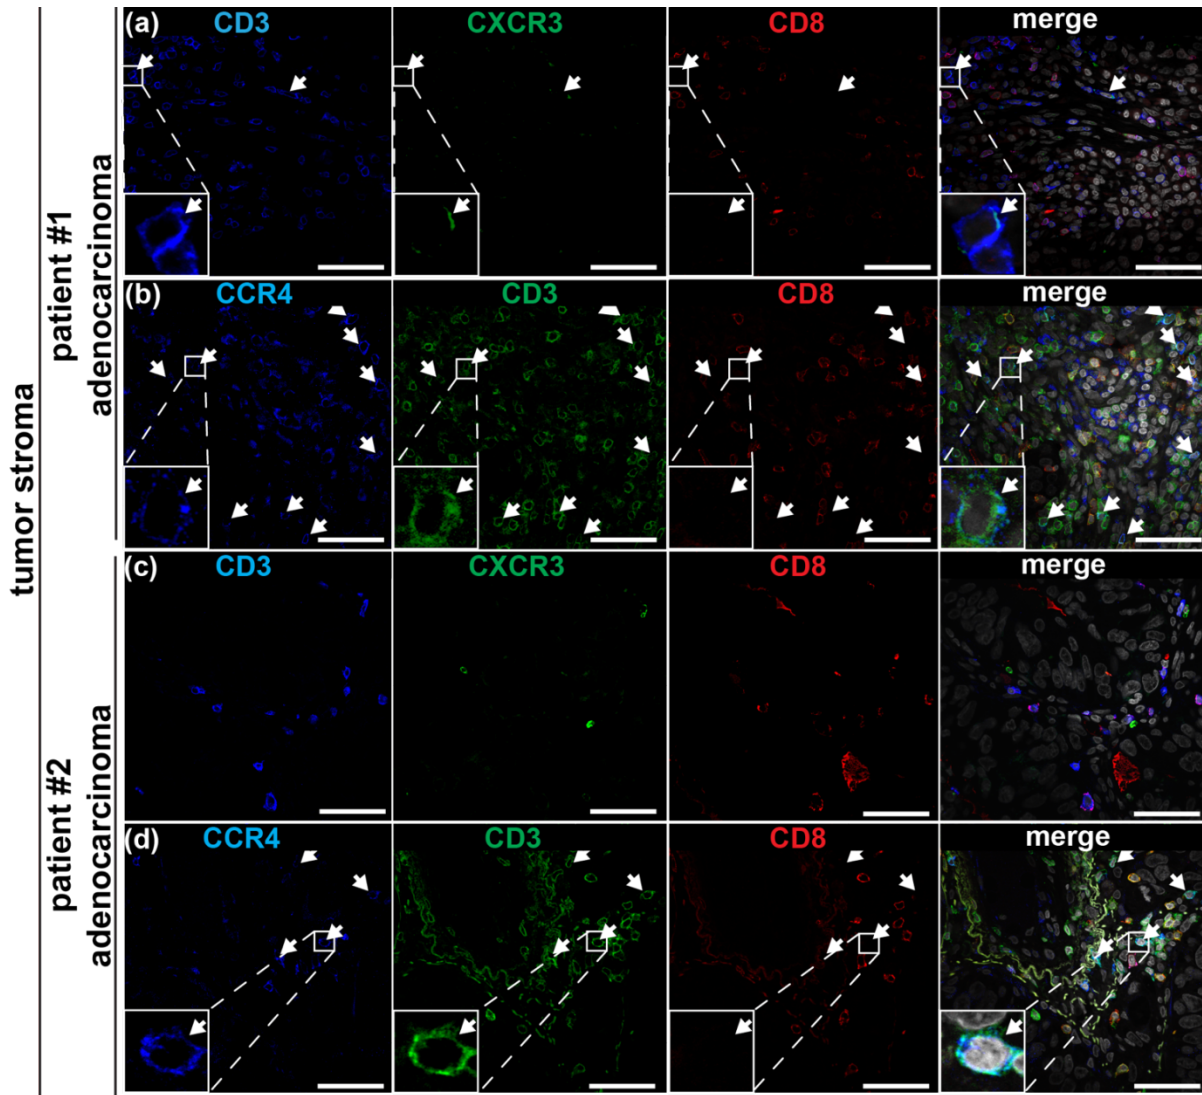

**Supplementary Figure 7. Detection of Th1 and Th2 cells by immunofluorescence staining of chemokine receptors in NSCLC tumors.** Representative images of immunostained serial sections of tumor tissue from two patients with lung adenocarcinoma. Expression of CXCR3 and CCR4 were used as markers for Th1 and Th2 cells, respectively. **(a, c)** Detection of Th1 cells. Tumor sections were immunostained with anti-CD3 mAb (blue), anti-CXCR3 mAb (green), and anti-CD8 mAb (red). Only low numbers of CD3<sup>+</sup>CD8<sup>-</sup>CXCR3<sup>+</sup> Th1 cells (white arrows) were observed. **(b, d)** Detection of Th2 cells. Tumor sections were immunostained with anti-CCR4 polyclonal rabbit IgG (blue), anti-CD3 mAb (green), and anti-CD8 mAb (red). The observed CD3<sup>+</sup>CD8<sup>-</sup>CCR4<sup>+</sup> Th2 cells are indicated by white arrows. Similar results were observed in tumor tissue from all investigated NSCLC patients (n=3) and are consistent with a predominance of Th2 cells in lung tumors. Original magnification, 600x. Scale bars, 50  $\mu$ m.

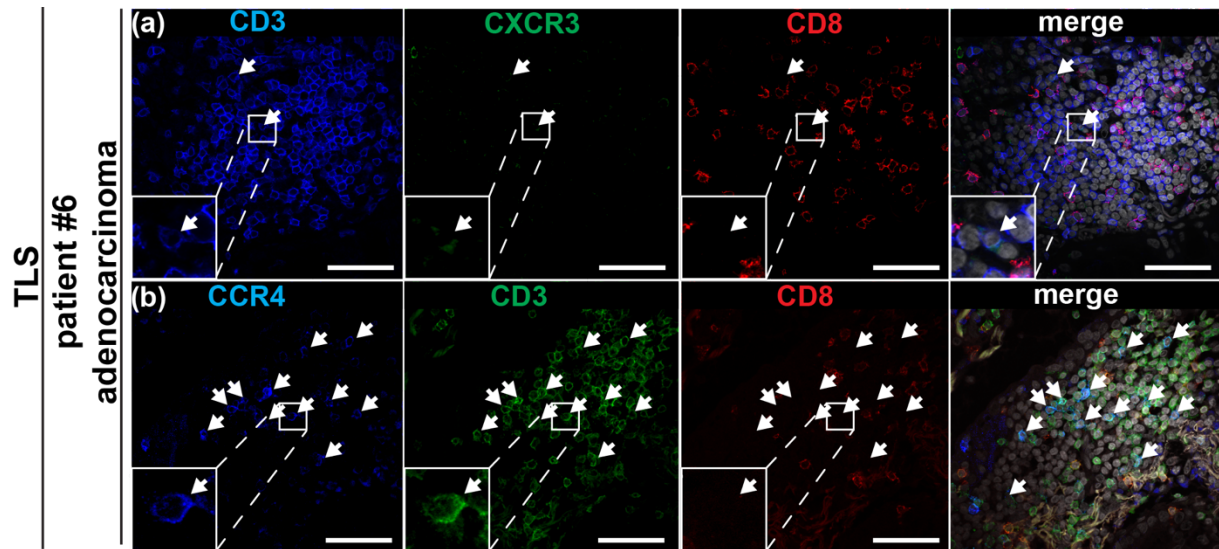

**Supplementary Figure 8. Detection of Th1 and Th2 cells by immunofluorescence staining of chemokine receptors in tertiary lymphoid structures (TLS).** Representative images of immunostained serial sections of a TLS from one patient with lung adenocarcinoma. Expression of CXCR3 and CCR4 were used as markers for Th1 and Th2 cells, respectively. **(a)** Detection of Th1 cells. The TLS was immunostained with anti-CD3 mAb (blue), anti-CXCR3 mAb (green), and anti-CD8 mAb (red). Only low numbers of CD3<sup>+</sup>CD8<sup>+</sup>CXCR3<sup>+</sup> Th1 cells (white arrows) were observed. **(b)** Detection of Th2 cells. The TLS was immunostained with anti-CCR4 polyclonal rabbit IgG (blue), anti-CD3 mAb (green), and anti-CD8 mAb (red). The observed CD3<sup>+</sup>CD8<sup>+</sup>CCR4<sup>+</sup> Th2 cells are indicated by white arrows. Similar results were observed in TLS from all investigated NSCLC patients (n=3) and are consistent with a predominance of Th2 cells in TLS. Original magnification, 600x. Scale bars, 50  $\mu$ m.



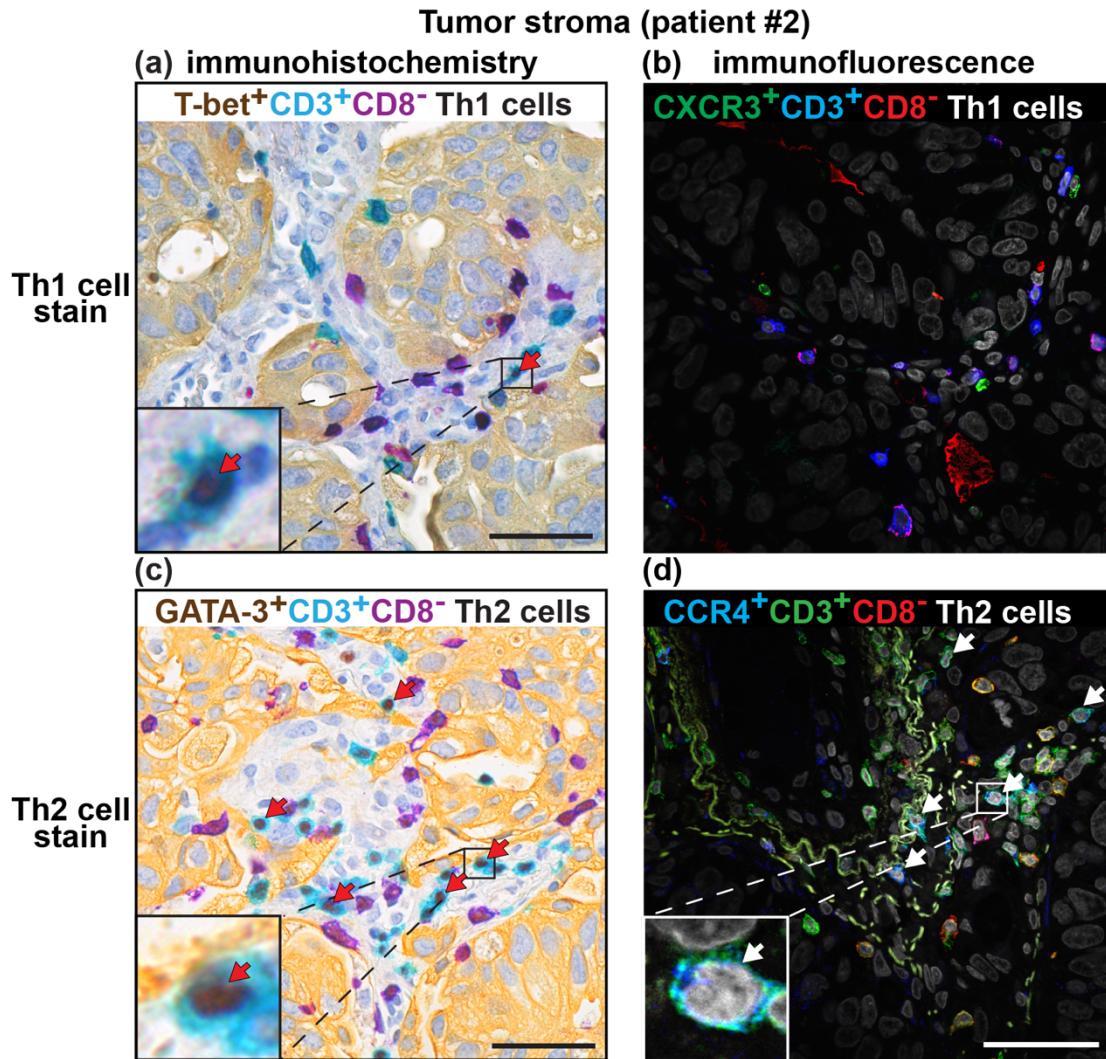

**Supplementary Figure 9. Comparison of the number of intratumoral Th1 and Th2 cells detected by chromogenic IHC vs. immunofluorescence.** Representative images of immunostained tumor sections from one patient with lung adenocarcinoma (patient #2). Boxed areas are enlarged and presented as corner insets. The positive cells for each Th subset in tumor stroma are indicated by red or white arrows. **(a)** Th1 cells (T-bet<sup>+</sup>CD3<sup>+</sup>CD8<sup>-</sup>) detected by chromogenic IHC. **(b)** Th1 cells (CXCR3<sup>+</sup>CD3<sup>+</sup>CD8<sup>-</sup>) detected by immunofluorescence. **(c)** Th2 cells (GATA-3<sup>+</sup>CD3<sup>+</sup>CD8<sup>-</sup>) detected by chromogenic IHC, using the anti-GATA-3 mAb clone L50-816. **(d)** Th2 cells (CCR4<sup>+</sup>CD3<sup>+</sup>CD8<sup>-</sup>) detected by immunofluorescence. Similar results were obtained from all three investigated NSCLC patients. Original magnification, 600x. Scale bars, 50  $\mu$ m.



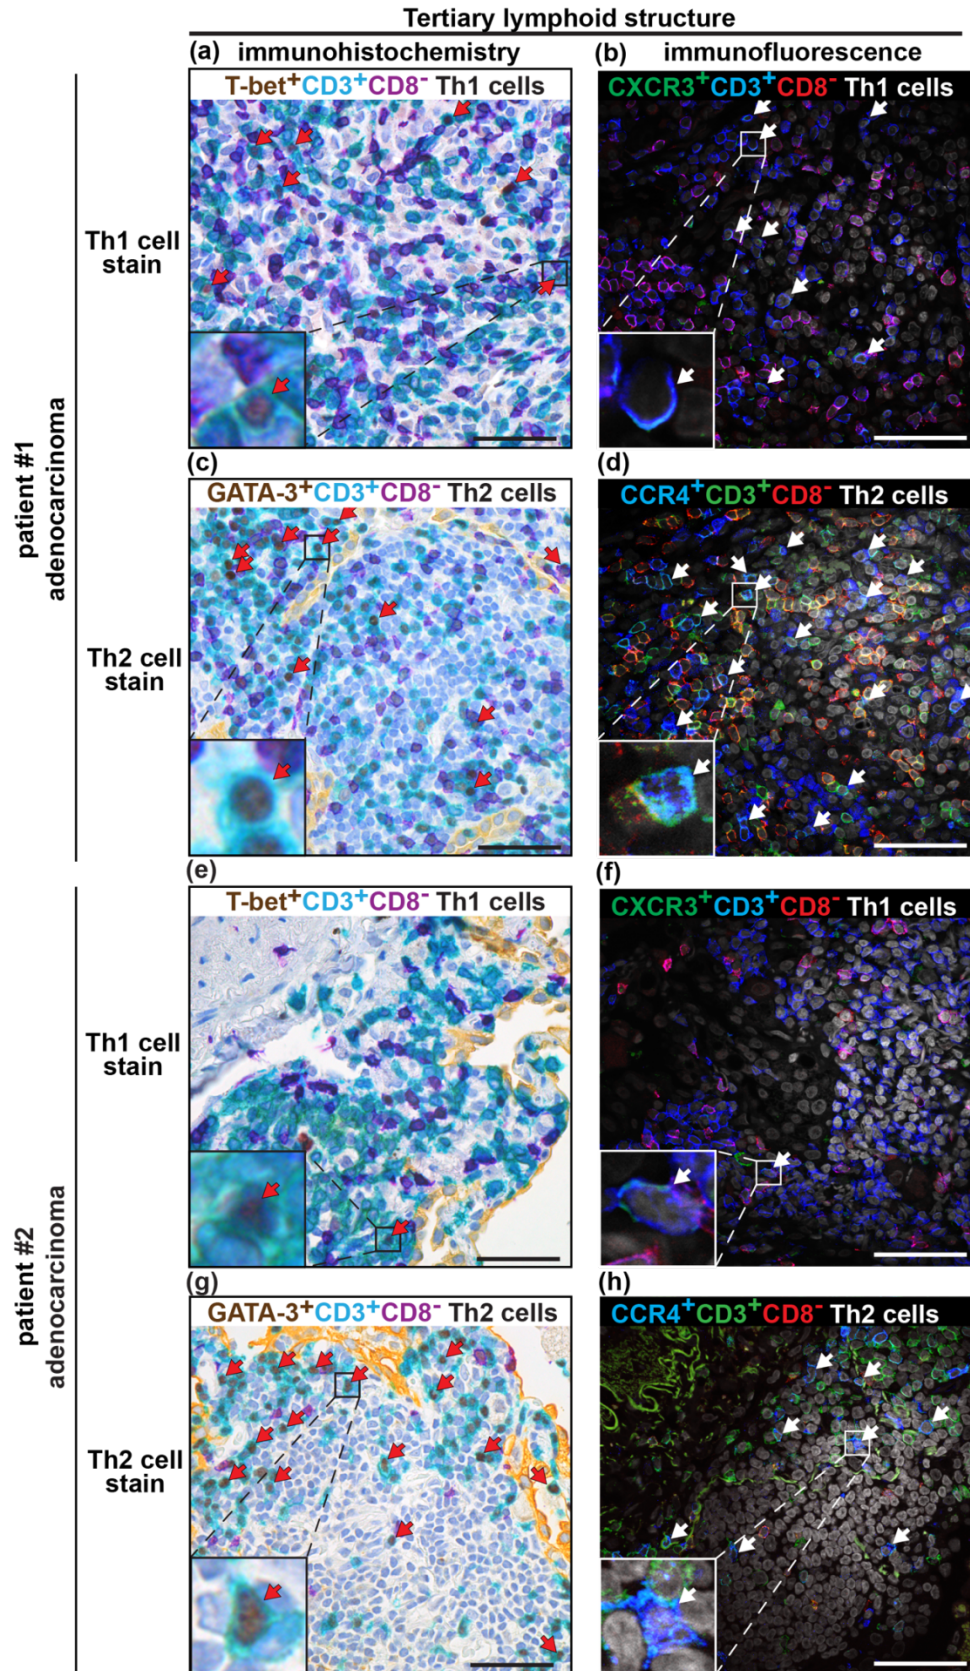

**Supplementary Figure 10. Comparison of the number of Th1 and Th2 cells detected by chromogenic IHC vs. immunofluorescence in tertiary lymphoid structures (TLS).** Representative images of immunostained sections of TLS from two patients with lung adenocarcinoma. Boxed areas are enlarged and presented as corner insets. The positive cells for each Th subset in tumor stroma are indicated by red or white arrows. **(a, e)** Th1 cells (T-bet<sup>+</sup>CD3<sup>+</sup>CD8<sup>-</sup>) detected by chromogenic IHC. **(b, f)** Th1 cells (CXCR3<sup>+</sup>CD3<sup>+</sup>CD8<sup>-</sup>) detected by immunofluorescence. **(c, g)** Th2 cells (GATA-3<sup>+</sup>CD3<sup>+</sup>CD8<sup>-</sup>) detected by chromogenic IHC, using the anti-GATA-3 mAb clone L50-816. **(d, h)** Th2 cells (CCR4<sup>+</sup>CD3<sup>+</sup>CD8<sup>-</sup>) detected by immunofluorescence. Similar results were observed in TLS from all the investigated NSCLC patients (n=3). Original magnification, 600x. Scale bars, 50  $\mu$ m.



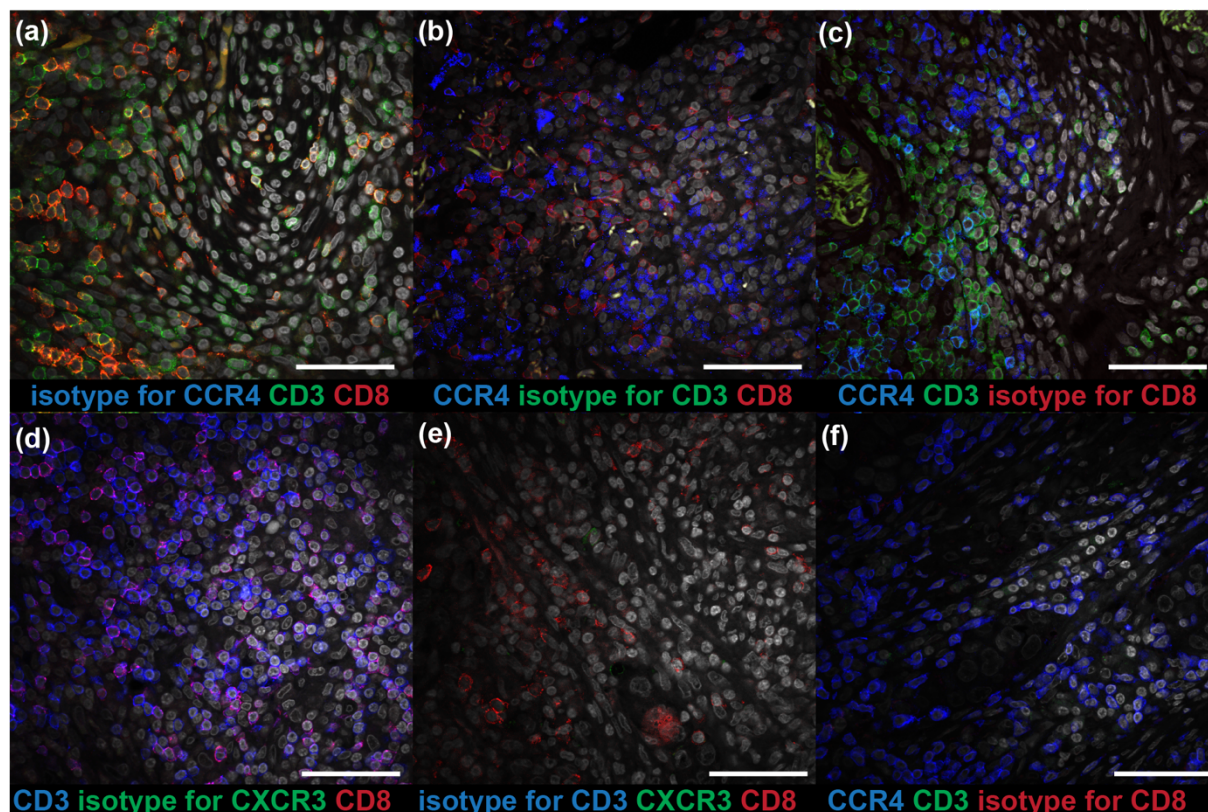

**Supplementary Figure 11. Isotype-matched antibodies with irrelevant specificity as controls for immunofluorescence staining.** (a-c) As controls for the CCR4/CD3/CD8 immunofluorescence staining, NSCLC tumor tissue sections were incubated with (a) isotype-matched control (rabbit IgG) for the CCR4 polyclonal antibody (blue) plus anti-CD3 mAb clone F7.2.38 (green) plus anti-CD8 mAb clone 4B11 (red); (b) anti-CCR4 polyclonal antibody (blue) plus anti-CD8 mAb clone 4B11 (red) plus isotype-matched control (mouse IgG1) for anti-CD3 antibody clone F7.2.38 (green); (c) anti-CCR4 polyclonal antibody (blue) plus anti-CD3 mAb clone F7.2.38 (green) plus isotype-matched control (mouse IgG2b) for anti-CD8 antibody clone 4B11 (red). (d-f) As controls for the CD3/CXCR3/CD8 immunofluorescence staining, tissue sections were incubated with (d) anti-CD3 mAb clone 2GV6 (blue) plus anti-CD8 mAb clone 4B11 (red) plus isotype-matched control (mouse IgG1) for the CXCR3 antibody clone 49801 (green); (e) anti-CXCR3 antibody clone 49801 (green) plus anti-CD8 mAb clone 4B11 (red) plus isotype-matched control (rabbit IgG) for anti-CD3 antibody (blue); (f) anti-CXCR3 antibody clone 49801 (green) plus anti-CD3 mAb clone 2GV6 (blue) plus isotype-matched control (mouse IgG2b) for anti-CD8 antibody clone 4B11 (red). Original magnification, 600x. Scale bars, 50  $\mu$ m.
